# Supplementary material for: [Retracted] Alleviation of Inflammation and Oxidative Stress in Pressure Overload‐Induced Cardiac Remodeling and Heart Failure via IL‐6/STAT3 Inhibition by Raloxifene
Source: Hindawi journal article supplement (doi:10.1155/2021/6699054), 2021-01-01
Supplement: f1 [file 6699054.f1.docx]

**Supplemental Figure legend**

**Supplemental Figure 1** Raloxifene relative selectively inhibited the phosphorylation of STAT3 induced by IL-6. Raloxifene (25μm, 4h) inhibited the STAT3 phosphorylation induced by IL-6 (25ng/mL, 30min) in H9c2 myoblasts, but not STAT1 and STAT5 phosphorylation. The phosphorylation of STAT1, STAT3 and STAT5 induced by the other cytokines of IL-6 family, such as LIF (25ng/mL, 30min) and OSM (25ng/mL, 30min) were not inhibited by raloxifene.

**Supplemental Figure 1**

**
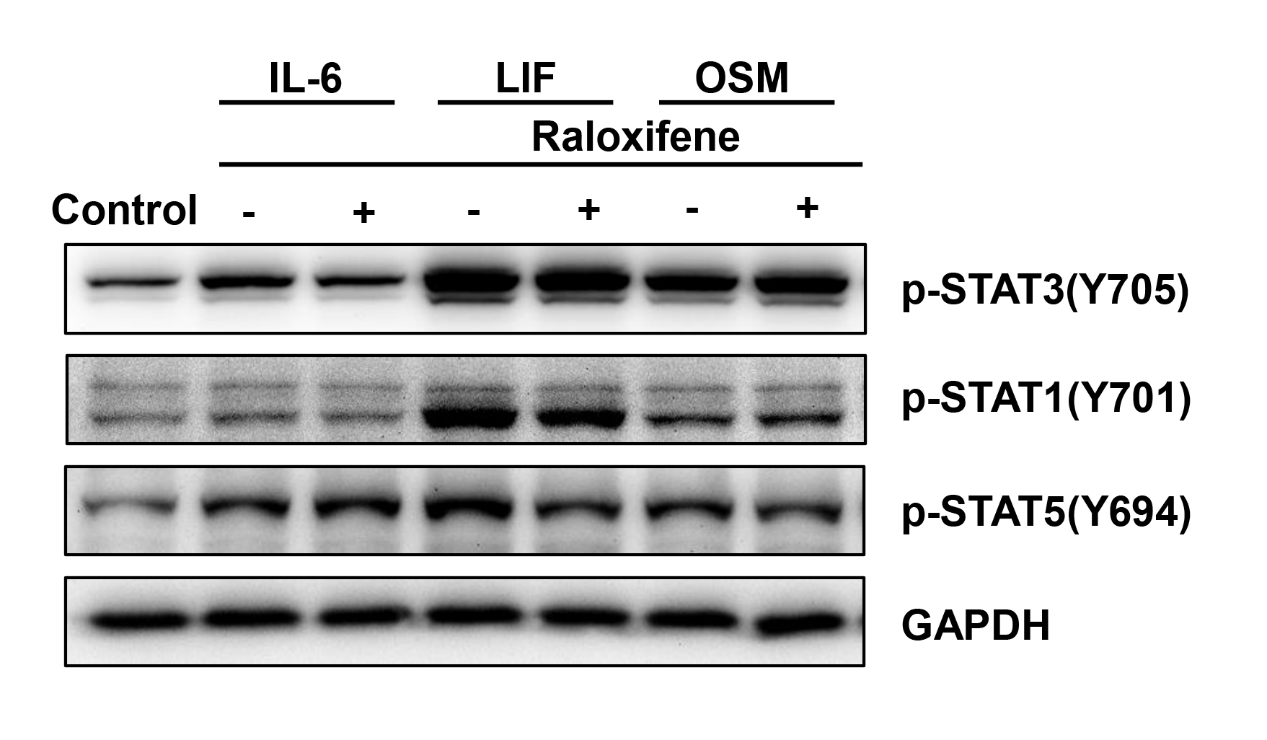
**
